# Supplementary material
Source: PubMed Central journal article supplement (PMC4060722)
Supplement: 1401553111_pnas.201401553SI.pdf [file 1401553111_pnas.201401553SI.pdf]

# Supporting Information

Kemen et al. 10.1073/pnas.1401553111

## SI Materials and Methods

**Assessment of Root Length and Metabolite Analysis.** Root lengths of *Avena strigosa* seedlings grown on 1% distilled water agar plates maintained vertically upright in a growth chamber at 22 °C (16-h light/8-h dark photoperiod) were measured from scanned images using Image J after 15 d of growth. For  $\beta$ -amyryn feeding experiments, seeds of *A. strigosa* wild-type and saponin-deficient 1 (*Sad1*) mutant lines were germinated on distilled water agar plates containing 50 or 100  $\mu$ M  $\beta$ -amyryn (stock solution of 10 mM made in methanol); control plates contained an equivalent amount of methanol alone) and were grown at 22 °C with a 16-h light/8-h dark photoperiod for 7 d. For metabolite analysis roots were excised from 11-d-old seedlings and extracted with 75% (vol/vol) methanol at 4 °C overnight with shaking. Extracts were analyzed by LC-MS as described previously (1).

Transgenic rice lines #21 and #22 expressing oat  $\beta$ -amyryn synthase (*SAD1*) under the control of the maize ubiquitin promoter (2) were grown on GM medium (3). Root lengths were measured after 8 d. Roots also were examined at higher resolution by cryo-scanning electron microscopy (cryo-SEM) after 4 d (see below).

**Plant Transformation.** Promoter-deletion constructs were introduced into *Arabidopsis thaliana* Col0 plants by *Agrobacterium tumefaciens*-mediated transformation, and stable transformants were selected on hygromycin-containing plates. At least four independent lines per construct were used for analysis of reporter gene expression. Construct pHGWFSBAS2992, comprising 2,992 bp of the *Sad1* promoter region, was introduced into rice variety Nipponbare using the method described by Vain et al. (4). The same construct was used for hairy root transformation of *Medicago truncatula* using *Agrobacterium rhizogenes* ARQUA1 (5). To investigate promoter activity during nodule formation, transformed *M. truncatula* roots were infected with *Sinorhizobium meliloti* as described by Marsh et al. (6).

**Microscopy. Analysis of  $\beta$ -Glucuronidase expression.** For detection of  $\beta$ -glucuronidase (GUS) activity, seedlings were fixed in 90% ice-cold acetone and rinsed with 3 mM potassium ferrocyanide, 50 mM NaPO<sub>4</sub> (pH 7). Then they were stained in 1 mM 5-bromo-4-chloro-3-indoyl glucuronide [in 3 mM potassium ferrocyanide, 50 mM NaPO<sub>4</sub> (pH 7)] at 37 °C overnight followed by serial washing steps from 10–70% (vol/vol) ethanol. GUS-stained roots were embedded in Technovit 7100 resin (Heraeus Kulzer GmbH). Sections (10  $\mu$ m) were prepared using an ultramicrotome (UltraCut E, Reichert-Jung) and examined using a Leica Axiophot microscope.

**Fluorescence microscopy.** GFP fluorescence was detected using a Leica SP5 confocal microscope [Leica Microsystems (UK) Ltd.] with a 488-nm laser for excitation and a BP 500- to 530-nm filter for emission. Avenacin A-1 fluorescence was imaged using a Leica Axiophot microscope (363-nm excitation, 450- to 465-nm emission) as previously described (7). Images were processed with ImageJ and assembled using Adobe Photoshop CS4.

**Cryo-SEM.** Roots of 2- to 4-d-old *A. strigosa* or rice seedlings were mounted horizontally on the specimen holder using a thin layer of OCT compound (BDH Laboratory Supplies). Samples then were plunged into liquid nitrogen slush at approximately –210 °C and were transferred to the cryo-stage of a CT1500HF cryo-transfer system (Gatan) attached to an FEI XL30 FEG scanning electron microscope (FEI UK Ltd). The temperature was raised to –95 °C to sublime the surface ice for 3 min and then was cooled immediately to below –110 °C before sputter coating with platinum for ~150 s at 10 mA. After sputter coating, samples

were moved onto the cryo-stage in the main chamber of the microscope, held at approximately –145 °C, and viewed at 3 kV.

**RNA Extraction.** Sections of 1 mm were taken from the root tips and from the maturation zone of *A. strigosa* seedlings. Fifty seedlings were used per extraction, with three biological replicates for each treatment. RNA was extracted using either TRI reagent (Sigma), followed by phenol/chloroform purification and selective precipitation with sodium acetate or an RNeasy Plant Mini Kit (Qiagen). After DNase I (Roche) digestion, first-strand cDNA synthesis was performed with SuperScript III RT (Invitrogen) using 4–10  $\mu$ g of total RNA. Quantitative RT-PCR (qRT-PCR) and relative quantification were performed as previously described (8) using either an Opticon instrument (MJ Research) or a Bio-Rad CFX96 real-time PCR detection system/C1000 thermal cycler.

**Transcriptome Analysis.** mRNA was extracted from the terminal 0.5 cm of the root tips of 3-d-old *A. strigosa* seedlings germinated on distilled water agar. RNA was extracted using TRIzol reagent (Life Technologies) and was purified using an Oligotex mRNA minikit (Qiagen). A combination of zinc chloride and heat was used to fragment the mRNA, and then first- and second-round cDNA synthesis was carried out using the Roche cDNA synthesis kit (with random hexamer primers). 454-Specific adapters were ligated to the cDNA, which then was size-selected according to the 454 rapid library protocol. This library was quantified using qPCR and subjected to a full-scale emulsion-based CR to generate templated beads for sequencing on the 454 platform. Massively parallel pyrosequencing was undertaken using 454 titanium chemistry (Roche) to generate more than 600 Mbp of sequence reads. Individual reads were processed through Newbler to enable transcript assembly. Transcripts corresponding to previously characterized avenacin biosynthetic genes were identified within this contig collection. Each of the five contigs identified contained the full-length coding sequence (CDS) plus flanking 5' and 3' UTR sequences (Table S1). The 454 contig collection then was mined for class IV homeodomain leucine zipper (HD-ZIP IV) family members that were identified through BLAST (tBLASTn) searches using all 16 *A. thaliana* HD-ZIP IV family members. We identified 101 reads corresponding to a single contig (c04446).

**Subcloning of *AsHDZ1*.** The complete coding sequence of *AsHDZ1* was amplified from cDNA using the primers listed in Table S2. *AsHDZ1* was subcloned using the pENTR Directional TOPO Cloning Kit (Invitrogen).

**Phylogenetic Analysis.** Amino acid sequences from HD-ZIP IV family members from the monocots *Brachypodium* (Bd), wheat (Ta), barley (Hv), rice (Os), maize (Zm), and *Aegilops* (Aet) and from the eudicots *A. thaliana* (At) and grape (Vv) were obtained from National Center for Biotechnology Information (NCBI). The names in the phylogenetic tree correspond to the NCBI identification numbers. Sequences for poplar were obtained from table S2 of Hu et al. (9). *M. truncatula* (Medtr) sequences were downloaded from the NCBI and HAPMAP ([www.medicagohapmap.org/](http://www.medicagohapmap.org/)) databases. HD-ZIP proteins from *Physcomitrella patens* (Pp) were downloaded from ([www.uniprot.org/](http://www.uniprot.org/)).

The HD-ZIP family IV sequences were aligned using ClustalW2 (10). The maximum likelihood (11) phylogenetic tree was generated based on a gap-free alignment with 1,000 replicates of bootstrap analysis. The unrooted phylogenetic tree was displayed using FigTree (v1.4.0) (<http://tree.bio.ed.ac.uk/software/figtree>).





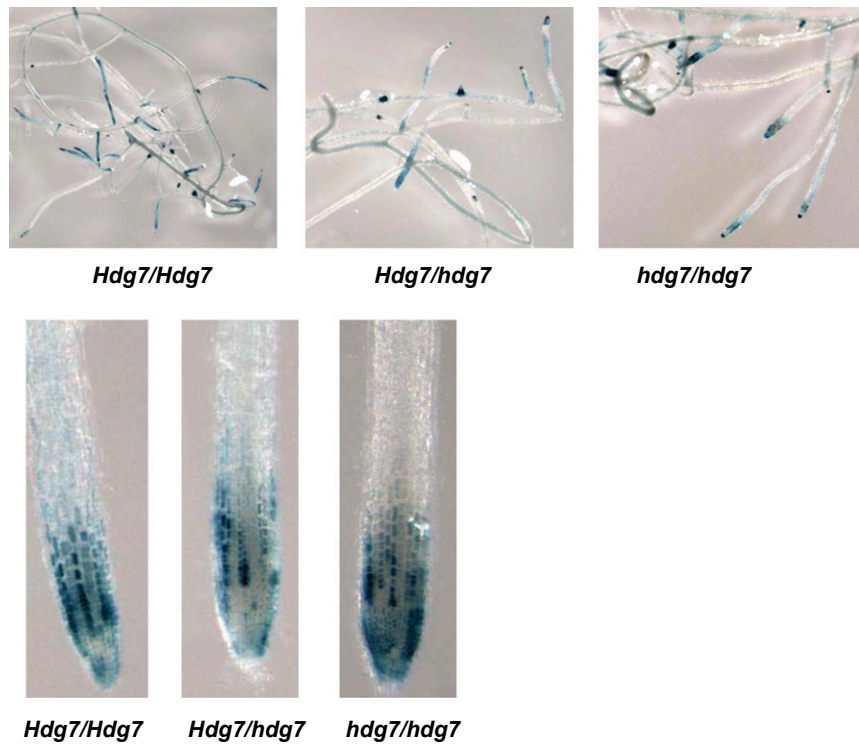

**Fig. S4.** *pSad1-GUS* expression is not compromised in *hdg7* mutant lines. Detection of GUS activity in 10-d-old *A. thaliana* seedlings (*Upper*) and in primary root tips (*Lower*) is shown.











**Table S2. Primer sequences for *Sad1*, *Sad2*, and *Ubi* promoter–reporter constructs and deletion series and cloning of *AsHDZ1***

| Gene             | Primer                                            | Sequence 5'–3'                                            |
|------------------|---------------------------------------------------|-----------------------------------------------------------|
| <i>Sad1</i>      | pBAS-F                                            | GGGGACAAGTTTGTACAAAAAAGCAGGCTATGTCCCTATCTATATTTGAG        |
|                  | pBAS_R                                            | GGGGACCACCTTTGTACAAGAAAGCTGGGTGCCATGGTGCCCAACAACG         |
|                  | AS-amy1848F                                       | GAGCTCGGATCCGATCACTGGCTACGCCGAGATTCTAC                    |
|                  | ASamy-P3R                                         | GGATCCGAGCTCGAGCAATGTTCTTATTCTCGCAGCCTAGA                 |
|                  | pBAS-F2893                                        | GGGGACAAGTTTGTACAAAAAAGCAGGCTGATTTTTTCTAAGATTAATGTG       |
|                  | pBAS-F2797                                        | GGGGACAAGTTTGTACAAAAAAGCAGGCTCGTTAGCCCAATGGGCTACG         |
|                  | pBAS-F2700                                        | GGGGACAAGTTTGTACAAAAAAGCAGGCTGTCAAGCTACGCCGACGGTC         |
|                  | pBAS-F2598                                        | GGGGACAAGTTTGTACAAAAAAGCAGGCTGTAACATCCTAACCCTTAGG         |
|                  | pBAS-F2488                                        | GGGGACAAGTTTGTACAAAAAAGCAGGCTCAATATCAGATTAACCTGGG         |
|                  | pBAS-F2397                                        | GGGGACAAGTTTGTACAAAAAAGCAGGCTCTGCAAGACAAGATCCACGG         |
|                  | pBAS-F2295                                        | GGGGACAAGTTTGTACAAAAAAGCAGGCTCAACCATCGTGTATTCTGCAC        |
|                  | pBAS-F2191                                        | GGGGACAAGTTTGTACAAAAAAGCAGGCTCTTACATGCGGTGTCTGATC         |
|                  | pBAS-F2108                                        | GGGGACAAGTTTGTACAAAAAAGCAGGCTCGTCTTATGGCCTCGAGTAC         |
|                  | pBAS-F1976                                        | GGGGACAAGTTTGTACAAAAAAGCAGGCTCTAGTGGCACTACTGAAATC         |
| pBAS-R.1kb       | GGGGACCACCTTTGTACAAGAAAGCTGGGTGAGAGCTTTACGGAATCCG |                                                           |
| <i>Sad2</i>      | pCYP A-F                                          | GGGGACAAGTTTGTACAAAAAAGCAGGCTGTGTGATAGGGACCCATGC          |
|                  | pCYP A-R                                          | GGGGACCACCTTTGTACAAGAAAGCTGGGTGCCATGTCTTATTGACTAGAGG      |
| <i>Ubiquitin</i> | pUBI-F                                            | GGGGACAAGTTTGTACAAAAAAGCAGGCTAATGAGCATTGCATGCTAAG         |
|                  | pUBI-R                                            | GGGGACCACCTTTGTACAAGAAAGCTGGGTGCCATTGCAAGAAGTAACACCAACAAC |
| <i>AsHDZ1</i>    | AsHD-ZIP-F-GW                                     | CACCATGAGCTTTGGGGGCTCTTTTGAC                              |
|                  | AsHD-ZIP-R-GW                                     | CTMACAATCAGGCATTGGGCACTG                                  |

**Table S3. Primer sequences for qRT-PCR**

| Gene                           | Gene-specific primer | Sequence 5'–3'       |
|--------------------------------|----------------------|----------------------|
| <i>Sad1</i>                    | Sad1q-5'             | TGCGGAATTCACAAAGAACA |
|                                | Sad1q-3'             | GCTTGGCTTCTGTCCGAATA |
| <i>CAS1</i>                    | CAS1-2q-5'           | CATCATGGGAAAGTTTTGG  |
|                                | CAS1-2q-3'           | GTGACACCACATTCGACCTG |
| <i>Sad2</i>                    | Sad2q-5'             | TCGACAGGAAGTGGAGGAGT |
|                                | Sad2q-3'             | ATCTCGGACCTCACTTCCAA |
| <i>Cyp51G1</i>                 | Cyp51q-5'            | ACTACCTGGTCAGGCAGGAG |
|                                | Cyp51q-3'            | CCCCACGTCGAGAAGTAGTC |
| <i>EF1-<math>\alpha</math></i> | EF1aq-5'             | TCCCCATCTCTGGATTTGAG |
|                                | EF1aq-3'             | TCTCTTGGGCTCGTTGATCT |
| <i>AsHDZ1</i>                  | C04446_1-5'          | GCAGCCTTCAATGCACAGTA |
|                                | C04446_1-3'          | AGACGGATCTGTGATGTCC  |

*EF1- $\alpha$* , oat elongation factor1- $\alpha$ .
